# Supplementary material for: MHC class I H2-Kb negatively regulates neural progenitor cell proliferation by inhibiting FGFR signaling
Source: PubMed Central journal article supplement (PMC8270425; doi:10.1371/journal.pbio.3001311), 2021-06-28

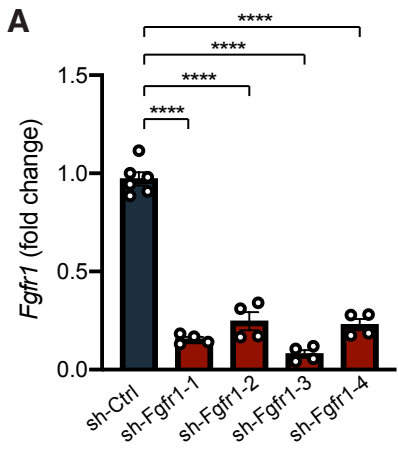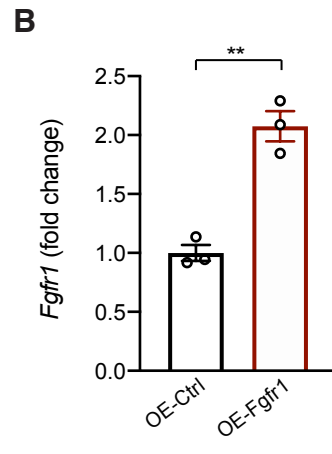

Supplement: pbio.3001311.s009.pdf [file pbio.3001311.s009.pdf]
