# Supplementary material for: MHC class I H2-Kb negatively regulates neural progenitor cell proliferation by inhibiting FGFR signaling
Source: PubMed Central journal article supplement (PMC8270425; doi:10.1371/journal.pbio.3001311), 2021-06-28

Original, uncropped Western blots (BioRad ChemiDoc)

ERK1/2

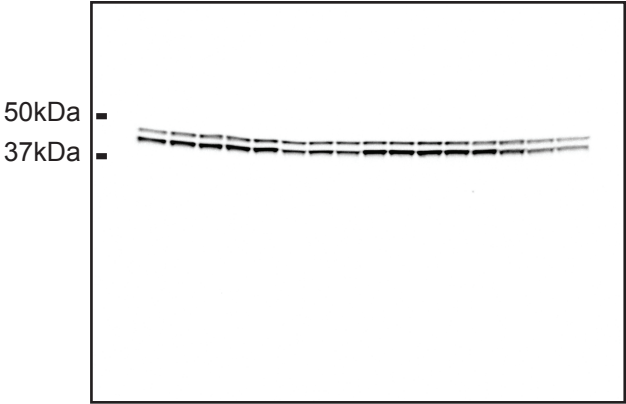

pERK1/2 (Thr202/204)

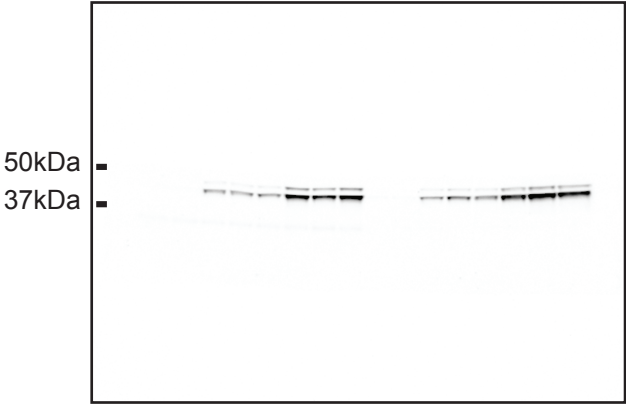

AKT

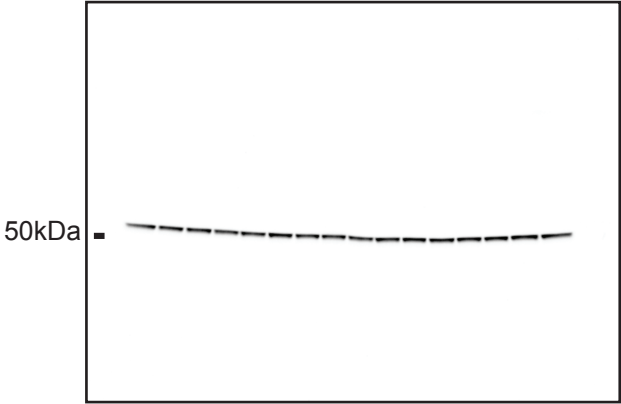

pAKT (Thr450)

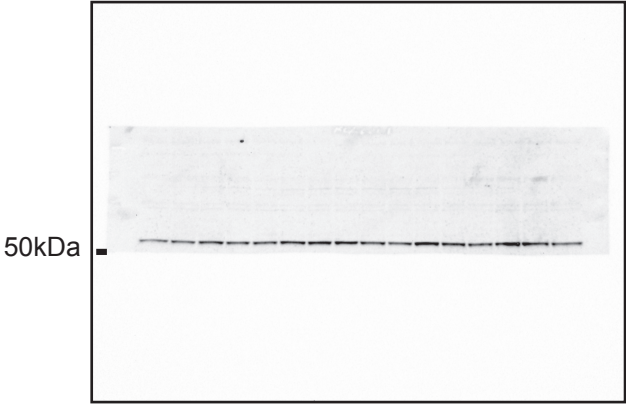

GAPDH

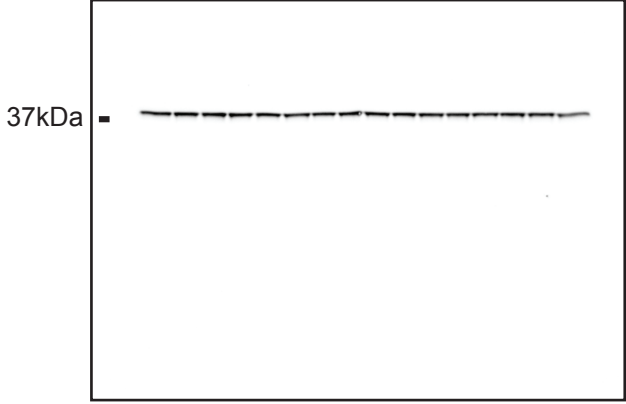

pS6 (Ser235/236)

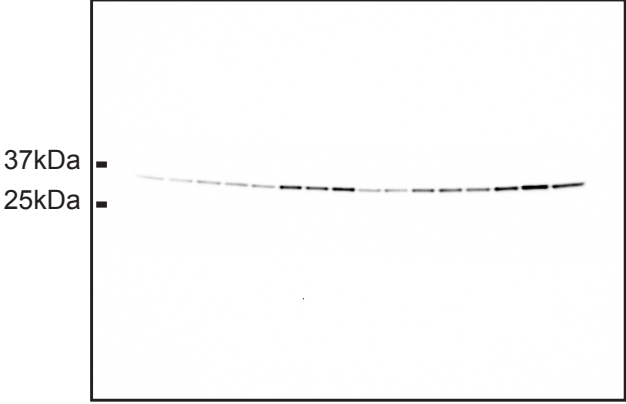

Supplement: pbio.3001311.s012.pdf [file pbio.3001311.s012.pdf]
