# Supplementary material for: MHC class I H2-Kb negatively regulates neural progenitor cell proliferation by inhibiting FGFR signaling
Source: PubMed Central journal article supplement (PMC8270425; doi:10.1371/journal.pbio.3001311), 2021-06-28
Supplement: pbio.3001311.s013.pdf [file pbio.3001311.s013.pdf]

**S1 Table**

| <b>REAGENT or RESOURCE</b>                                  | <b>SOURCE</b>            | <b>IDENTIFIER</b> |
|-------------------------------------------------------------|--------------------------|-------------------|
| <b>Antibodies</b>                                           |                          |                   |
| Rabbit polyclonal anti-Actin                                | Sigma-Aldrich            | Cat # A5060       |
| Rat monoclonal anti-BrdU                                    | Thermo Fisher Scientific | Cat # MA1-82088   |
| Rat monoclonal anti-CD68                                    | Bio-Rad                  | Cat # MCA1957     |
| Goat polyclonal anti-Doublecortin                           | Santa Cruz               | Cat # sc-8066     |
| Rabbit polyclonal anti-Erk1/2                               | Cell Signaling           | Cat # 4695        |
| Mouse monoclonal anti-GAPDH                                 | Abcam                    | Cat # Ab8245      |
| Rabbit polyclonal anti-GFAP                                 | Dako                     | Cat # Z0334       |
| Rabbit polyclonal anti-Iba1                                 | Wako                     | Cat # 01919741    |
| Mouse monoclonal anti-Map2                                  | Sigma-Aldrich            | Cat # M9942       |
| Mouse monoclonal anti-NeuN                                  | Millipore                | Cat # MAB377      |
| Mouse monoclonal anti-Nestin                                | Millipore                | Cat # MAB353      |
| Rabbit polyclonal anti-phospho Akt (Tyr450)                 | Millipore                | Cat # 07-1643     |
| Rabbit monoclonal anti-Phospho-Akt (Thr450)                 | Cell Signaling           | Cat # 12178       |
| Rabbit monoclonal anti-pan Akt                              | Cell Signaling           | Cat # 4691        |
| Rabbit polyclonal anti-phospho Erk1/2 (Thr202/Tyr204)       | Cell Signaling           | Cat # 4370        |
| Rabbit polyclonal anti-phospho S6 (Ser235/236)              | Cell Signaling           | Cat # 2211        |
| Rabbit polyclonal anti-TurboGFP                             | Thermo Fisher Scientific | Cat # PA5-22688   |
| Donkey anti-Rabbit: Alexa-488 conjugated secondary antibody | Thermo Fisher Scientific | Cat # A21206      |
| Donkey anti-Rabbit: Alexa-555 conjugated secondary antibody | Thermo Fisher Scientific | Cat # A3157       |
| Donkey anti-Rat: Alexa-488 conjugated secondary antibody    | Jackson ImmunoResearch   | Cat # 712-165-150 |
| Donkey anti-Goat: Alexa-555 conjugated secondary antibody   | Thermo Fisher Scientific | Cat # A21432      |
| Donkey anti-Mouse: Alexa-488 conjugated secondary antibody  | Thermo Fisher Scientific | Cat # A21202      |
| Donkey anti-Mouse: Alexa-555 conjugated secondary antibody  | Thermo Fisher Scientific | Cat # A31570      |
| Donkey anti-Mouse: Alexa-647 conjugated secondary antibody  | Thermo Fisher Scientific | Cat # A31571      |
| Donkey anti-Rabbit HRP-conjugated secondary antibody        | GE Healthcare            | Cat # NA934       |
| Goat anti-Guinea Pig HRP-conjugated secondary antibody      | Santa Cruz               | Cat # sc-2438     |
| Goat anti-Mouse HRP-conjugated secondary antibody           | Millipore                | Cat # AP124P      |
| <b>Bacterial and Virus Strains</b>                          |                          |                   |
| pGreenPuro lentivirus shRNA expression system               | System Biosciences       | Cat # SI505A-1    |
| <b>Chemicals, Peptides, and Recombinant Proteins</b>        |                          |                   |
| 5-bromo-2'-deoxyuridine (BrdU)                              | Sigma-Aldrich            | Cat # B5002       |
| 5-ethynyl-2'-deoxyuridine (EdU)                             | Life Technologies        | Cat # E10187      |
| Recombinant Epidermal Growth Factor (EGF)                   | Peptotech                | Cat # AF-100-15   |

|                                                                                                                                                                   |                          |                             |
|-------------------------------------------------------------------------------------------------------------------------------------------------------------------|--------------------------|-----------------------------|
| Recombinant Fibroblast Growth Factor-basic (FGF)                                                                                                                  | Peprotech                | Cat # 100-18B               |
| PD 161570 (selective FGFR inhibitor)                                                                                                                              | Tocris                   | Cat # 3724                  |
| Hoechst 33342                                                                                                                                                     | Thermo Fisher Scientific | Cat # H3570                 |
| Alexa Fluor 488 Azide                                                                                                                                             | Thermo Fisher Scientific | Cat # A10266                |
| Alexa Fluor 555 Azide                                                                                                                                             | Thermo Fisher Scientific | Cat # A20012                |
| Alexa Fluor 647 Azide                                                                                                                                             | Thermo Fisher Scientific | Cat # A10277                |
|                                                                                                                                                                   |                          |                             |
| <b>Critical Commercial Assays</b>                                                                                                                                 |                          |                             |
| Click-iT EdU Alexa Fluor Imaging Kit                                                                                                                              | Thermo Fisher Scientific | Cat # C10337                |
| Click-iT Plus EdU Alexa Fluor Flow Cytometry Assay Kit                                                                                                            | Thermo Fisher Scientific | Cat # C10634                |
| Rneasy Mini Kit                                                                                                                                                   | Qiagen                   | Cat # 74106                 |
| High Capacity cDNA Reverse Transcription Kit                                                                                                                      | Life Technologies        | Cat # 4368814               |
| Power SYBR Green PCR Master Mix                                                                                                                                   | Life Technologies        | Cat # 4367659               |
| Kapa HiFi HotStart ReadyMix                                                                                                                                       | Kapa Biosystems          | Cat # KK2601                |
| Nextera XT DNA Library Prep Kit                                                                                                                                   | Illumina                 | Cat # FC-131-1096           |
| qPCR Library Quantification Kit                                                                                                                                   | Kapa Biosystems          | Cat # KK 4824               |
|                                                                                                                                                                   |                          |                             |
|                                                                                                                                                                   |                          |                             |
| <b>Deposited Data</b>                                                                                                                                             |                          |                             |
| Single cell sequencing data                                                                                                                                       | Shin et al., 2015        | GEO: GSE71485               |
| Raw data files for RNA sequencing: NSCs                                                                                                                           | Current Manuscript       | ArrayExpress: E-MTAB-5827   |
|                                                                                                                                                                   |                          |                             |
| <b>Experimental Models: Organisms/Strains</b>                                                                                                                     |                          |                             |
| Mouse: C57BL/6Ntac                                                                                                                                                | Taconic                  | Model # B6-M                |
| Mouse: B6.129P2- <i>H2-Kb<sup>tm1</sup></i> <i>H2-Db<sup>tm1</sup></i> N12                                                                                        | Taconic                  | Model # 4215-M              |
| Mouse: B6.129P2- <i>H2-Kb<sup>tm1</sup></i> N12                                                                                                                   | Taconic                  | Model # 4216-M              |
| Mouse: B6.129P2- <i>H2-Db<sup>tm1</sup></i> N12                                                                                                                   | Taconic                  | Model # 4217-M              |
| Mouse: C57BL/6J                                                                                                                                                   | Jackson                  | Model # 000664              |
|                                                                                                                                                                   |                          |                             |
| <b>Recombinant DNA and Oligonucleotides</b>                                                                                                                       |                          |                             |
| pGreenPuro shRNA Cloning and Expression Lentivector                                                                                                               | System Biosciences       | Cat # SI505A-1              |
| Quantitative real-time PCR primers                                                                                                                                | Life Technologies        | Sequences in Method details |
| shRNA primers                                                                                                                                                     | Life Technologies        | Sequences in Method details |
| Nestin H2-K1/H2-D1/GFP/Fgfr1 expression construct                                                                                                                 | Current Manuscript       | Method details              |
|                                                                                                                                                                   |                          |                             |
| <b>Software and Algorithms</b>                                                                                                                                    |                          |                             |
| GraphPad Prism 6 and 8                                                                                                                                            | GraphPad                 | 6 and 8                     |
| Trim Galore!<br>( <a href="https://www.bioinformatics.babraham.ac.uk/projects/trim_galore/">https://www.bioinformatics.babraham.ac.uk/projects/trim_galore/</a> ) | Babraham Bioinformatics  | 0.4.1                       |

|                                                                                                                                                                  |                                                            |                    |
|------------------------------------------------------------------------------------------------------------------------------------------------------------------|------------------------------------------------------------|--------------------|
| HISAT2<br>( <a href="https://ccb.jhu.edu/software/hisat2/index.shtml">https://ccb.jhu.edu/software/hisat2/index.shtml</a> )                                      | Center for Computational Biology, Johns Hopkins University | 2.0.4              |
| Subread FeatureCounts<br>( <a href="http://bioinf.wehi.edu.au/featureCounts/">http://bioinf.wehi.edu.au/featureCounts/</a> )                                     | Walter + Eliza Hall Bioinformatics                         | 1.5.0              |
| R<br>( <a href="https://cran.r-project.org/">https://cran.r-project.org/</a> )                                                                                   | Comprehensive R Archive Network                            | 3.2.5              |
| DESeq2 BioC<br>( <a href="https://bioconductor.org/packages/release/bioc/html/DESeq2.html">https://bioconductor.org/packages/release/bioc/html/DESeq2.html</a> ) | Bioconductor                                               | 3.2                |
| ConsensusPathDB – Mouse<br>( <a href="http://cpdb.molgen.mpg.de/MCPDB">http://cpdb.molgen.mpg.de/MCPDB</a> )                                                     | Max-Planck-Institute for Molecular Genetics                | Release MM9        |
| ImageJ/FIJI                                                                                                                                                      | NIH                                                        | 1.8.0_91 and 2.1.0 |

### **CONTACT FOR REAGENT AND RESOURCE SHARING**

*Please contact Saul Villeda ([saul.villeda@ucsf.edu](mailto:saul.villeda@ucsf.edu)) for further information and requests for resources and reagents generated in this study.*
